# Supplementary material for: Mortality in first- and second-generation immigrants to Sweden diagnosed with type 2 diabetes: a 10 year nationwide cohort study
Source: PubMed Central journal article supplement (PMC7716891; doi:10.1007/s00125-020-05279-1), 2020-09-26
Supplement: 125_2020_5279_MOESM1_ESM.pdf [file 125_2020_5279_MOESM1_ESM.pdf]

**ESM Table 1.** Classification of type 1 and type 2 diabetes according to antidiabetic treatment received within 1 year after diagnosis date (date of first dispensed medication).

|                 | A10B*<br>Glucose lowering<br>medication | A10AB<br>Rapid acting<br>insulin | A10AC/A10AE<br>Intermediate- or long<br>lasting insulin | A10AD<br>Mix-insulin |
|-----------------|-----------------------------------------|----------------------------------|---------------------------------------------------------|----------------------|
| Type 1 diabetes | no                                      | <b>yes</b>                       | no                                                      | no                   |
|                 | no                                      | <b>yes</b>                       | <b>yes</b>                                              | no                   |
| Type 2 diabetes | no                                      | no                               | no                                                      | <b>yes</b>           |
|                 | <b>yes</b>                              | no                               | no                                                      | no                   |
|                 | <b>yes</b>                              | no                               | no                                                      | <b>yes</b>           |
|                 | no                                      | no                               | <b>yes</b>                                              | no                   |
|                 | no                                      | no                               | <b>yes</b>                                              | <b>yes</b>           |
|                 | <b>yes</b>                              | no                               | <b>yes</b>                                              | no                   |
|                 | <b>yes</b>                              | no                               | <b>yes</b>                                              | <b>yes</b>           |
|                 | no                                      | <b>yes</b>                       | no                                                      | <b>yes</b>           |
|                 | <b>yes</b>                              | <b>yes</b>                       | no                                                      | no                   |
|                 | <b>yes</b>                              | <b>yes</b>                       | no                                                      | <b>yes</b>           |
|                 | no                                      | <b>yes</b>                       | <b>yes</b>                                              | no                   |
|                 | <b>yes</b>                              | <b>yes</b>                       | <b>yes</b>                                              | no                   |
|                 | <b>yes</b>                              | <b>yes</b>                       | <b>yes</b>                                              | <b>yes</b>           |

\*A10B are Glucose lowering medications including Metformin monotherapy (A10BA02), Metformin in combination with glitazones (A10BD03; A10BD05) or with DPP-4 inhibitors (A10BD07; A10BD08, A10BD10), Sulphonylurea (A10BB); Alpha glucosidase inhibitors (A10BF01); Glitazones (A10BG02; A10BG03); DPP-4 inhibitors (A10BH01, A10BH02, A10BH03); GLP-1RA (A10BJ01, A10BJ02, A10BJ03, A10BJ05, A10BJ06); Other glucose lowering medications (A10BX02, A10BX03)

**ESM Table 2.** Definition of treatment groups

| <b>Treatment within 1 year of diabetes diagnosis</b> | <b>Insulin monotherapy</b> | <b>SU/repaglinid</b> | <b>Metformin monotherapy</b> | <b>Metformin combination tablets</b> | <b>Glitazon</b> | <b>DPP-4</b> | <b>Glucobay</b> | <b>Other</b> |
|------------------------------------------------------|----------------------------|----------------------|------------------------------|--------------------------------------|-----------------|--------------|-----------------|--------------|
| Insulin monotherapy <sup>a</sup>                     | <b>yes</b>                 | no                   | no                           | no                                   | no              | no           | no              | no           |
| Sulfonylureas/repaglinid <sup>b</sup>                | no                         | <b>yes</b>           | no                           | no                                   | no              | no           | no              | no           |
| Metformin monotherapy <sup>c</sup>                   | no                         | no                   | <b>yes</b>                   | no                                   | no              | no           | no              | no           |
| Insulin + <b>any</b> of the tablet(s)                | <b>yes</b>                 | yes                  | yes                          | yes                                  | yes             | yes          | yes             | yes          |
| Metformin <sup>d</sup> + sulfonylureas/repaglinid    | no                         | <b>yes</b>           | <b>yes</b>                   | <b>yes</b>                           | no              | no           | no              | no           |
| Metformin <sup>d</sup> +any other tablet(s)          | <b>no</b>                  | yes                  | <b>yes</b>                   | <b>yes</b>                           | yes             | yes          | yes             | yes          |
| <b>Other combinations or monotherapies</b>           | <b>no</b>                  | yes                  | <b>no</b>                    | <b>no</b>                            | yes             | yes          | yes             | yes          |

Note: other tablets include ATC codes: A10BG02, A10BG03, A10BH01, A10BH02, A10BH03, A10BF01, other A10BX\*

<sup>a</sup> ATC: A10A insulin & analogues

<sup>b</sup> ATC: A10BB\*, A10BX02

<sup>c</sup> ATC: A10BA02

<sup>d</sup> ATC: A10BA02, A10BD05, A10BD03, A10BD10, A10BD07, A10BD08

**ESM Table 3.** All-cause mortality, cardiovascular mortality and cancer mortality in Western and non-Western first-generation immigrants vs native Swedes.

|                        | All-cause mortality      |                          | Cardiovascular mortality |                          | Cancer mortality         |                          |
|------------------------|--------------------------|--------------------------|--------------------------|--------------------------|--------------------------|--------------------------|
|                        | HR (95% CI) <sup>a</sup> | HR (95% CI) <sup>b</sup> | HR (95% CI) <sup>a</sup> | HR (95% CI) <sup>b</sup> | HR (95% CI) <sup>a</sup> | HR (95% CI) <sup>b</sup> |
| <b>Region of birth</b> | N= 130,982               |                          | n=118,667                |                          | n= 118,667               |                          |
| Native Swedes          | Reference                | Reference                | Reference                | Reference                | Reference                | Reference                |
| Western                | <b>1.07 [1.02,1.13]</b>  | 0.96 [0.91,1.01]         | 1.10 [0.95,1.28]         | 0.95 [0.82,1.11]         | 1.07 [0.94,1.23]         | 1.06 [0.93,1.21]         |
| Non-Western            | <b>0.61 [0.55,0.67]</b>  | <b>0.46 [0.42,0.50]</b>  | <b>0.56 [0.42,0.77]</b>  | <b>0.37 [0.27,0.50]</b>  | <b>0.75 [0.59,0.95]</b>  | <b>0.70 [0.55,0.90]</b>  |

<sup>a</sup> Adjusted for age at diagnosis

<sup>b</sup> Adjusted for age at diabetes diagnosis, sex, attained education, disposable income, occupational socio-economic group, region of residence, and type of diabetes treatment.

**ESM Table 4.** Mean age at death and number of deaths across the groups.

|                                      | Native Swedes | First generation immigrants by geographical region of birth<br>n= 28,819 |                                 |                     |                               |                          |                   |                            |                            | Second generation immigrants<br>n= 7,103 |                         |                            |                          |
|--------------------------------------|---------------|--------------------------------------------------------------------------|---------------------------------|---------------------|-------------------------------|--------------------------|-------------------|----------------------------|----------------------------|------------------------------------------|-------------------------|----------------------------|--------------------------|
|                                      |               | Africa                                                                   | EU28 except Nordic <sup>a</sup> | Europe <sup>b</sup> | Nordic countries <sup>c</sup> | Middle East <sup>d</sup> | Asia <sup>e</sup> | Latin America <sup>f</sup> | North America <sup>g</sup> | Nordic countries                         | European but not Nordic | North America <sup>g</sup> | Non-Western <sup>h</sup> |
| n                                    | 102,163       | 2,277                                                                    | 4,590                           | 4,353               | 6,860                         | 6,883                    | 2,378             | 1,332                      | 146                        | 1,950                                    | 4,657                   | 320                        | 176                      |
| Age at death, mean (SD) <sup>i</sup> | 70.5 (7.8)    | 62.8 (10.4)                                                              | 70.0 (7.8)                      | 68.0 (8.7)          | 69.8 (8.1)                    | 64.0 (10.5)              | 63.4 (11.5)       | 64.7 (8.5)                 | 67.8 (9.2)                 | 65.4 (8.5)                               | 61.4 (10.0)             | 70.9 (7.2)                 | 56.8 (15.4)              |
| All-cause mortality, n               | 11,810        | 86                                                                       | 495                             | 372                 | 932                           | 237                      | 89                | 66                         | 10                         | 165                                      | 299                     | 44                         | 9                        |
| CVD mortality, n                     | 1,312         | 8                                                                        | 59                              | 33                  | 115                           | 24                       | 6                 | 6                          | 0                          | 10                                       | 28                      | 6                          | 0                        |
| Cancer mortality, n                  | 1,643         | 18                                                                       | 69                              | 60                  | 125                           | 31                       | 13                | 13                         | 1                          | 30                                       | 40                      | 4                          | 0                        |

<sup>a</sup> EU28 except Nordic includes Belgium, Bulgaria, Czech Republic, Germany, Estonia, Ireland, Greece, Spain, France, Croatia, Slovenia, Italy, Cyprus, Latvia, Lithuania, Luxembourg, Hungary, Malta, Netherlands, Austria, Poland, Portugal, Romania, Slovakia, United Kingdom

<sup>b</sup> Europe does not include EU28 and Nordic countries. Includes former Soviet Union, other former Yugoslavia, other Western Europe, other Eastern Europe

<sup>c</sup> Nordic countries except Sweden. Includes Finland.

<sup>d</sup> Middle East includes Iraq, Iran, Syria, Turkey, other Middle Eastern countries

<sup>e</sup> Asia includes Central Asia, East Asia, Southeast Asia, South Asia and the Indian Subcontinent, West Asia and the Caucasus

<sup>f</sup> Latin America and the Caribbean

<sup>g</sup> North America, Australia, New Zealand, and Oceania

<sup>h</sup> Non-Western includes Middle East, Africa, Asia and Latin America

<sup>i</sup> Mean age of death: first generation immigrants 68.3 years and second generation immigrants 63.4 years.
